# Supplementary material for: Adenovirus-Inspired Virus-like-Particles Displaying Melanoma Tumor Antigen Specifically Target Human DC Subsets and Trigger Antigen-Specific Immune Responses
Source: MDPI journal article supplement (doi:10.3390/biomedicines10112881), 2022-11-10
Supplement: s1 [file s1]

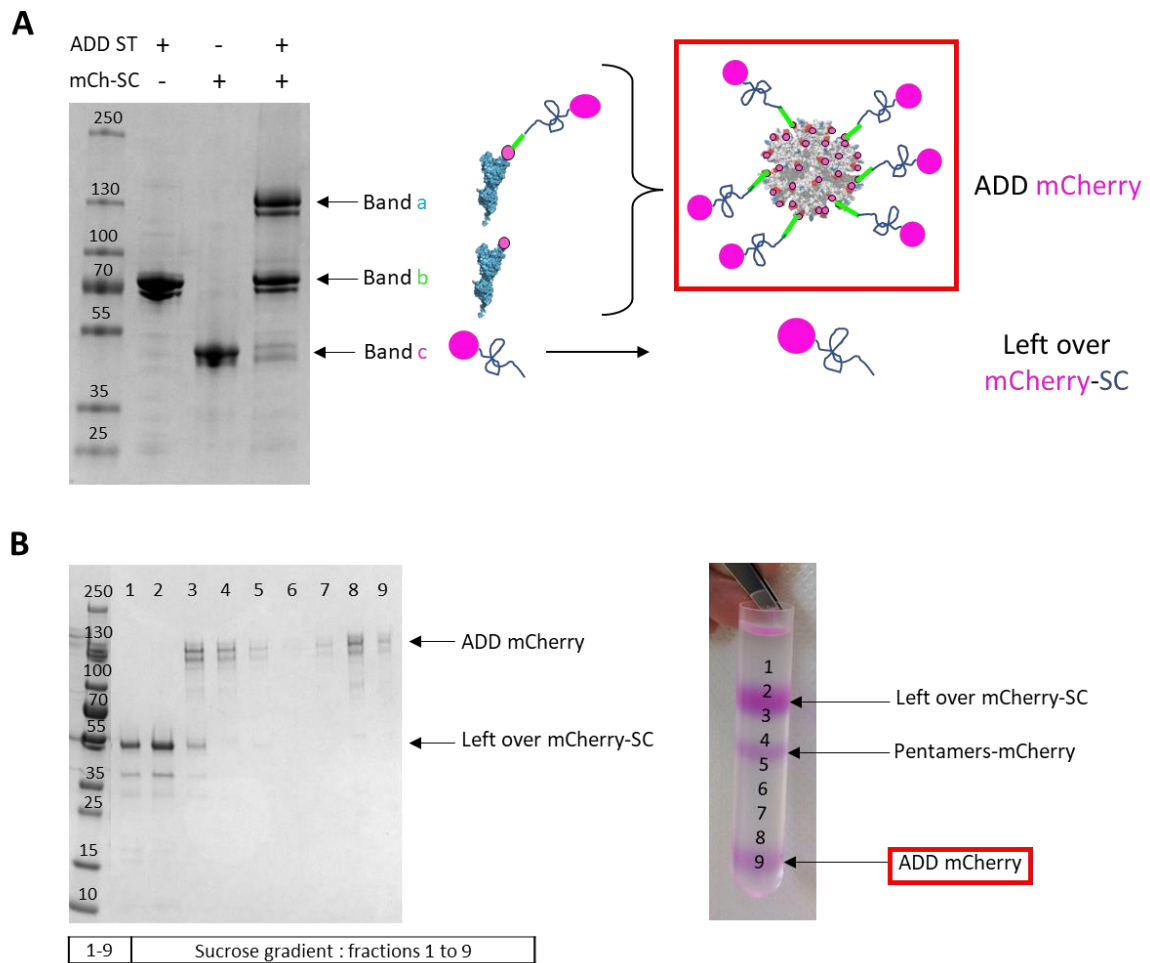

**Supplementary figure S1: Separation of the complex ADD-mCherry from the left over mCherry-SC**

(A) SDS PAGE gel of boiled and reduced samples showing left over mCherry-SC after incubation of ADD ST with mCherry-SC (B) SDS PAGE gel of boiled and reduced samples and sucrose gradient image showing the separation of the complex ADD mCherry and the left over mCherry-SC

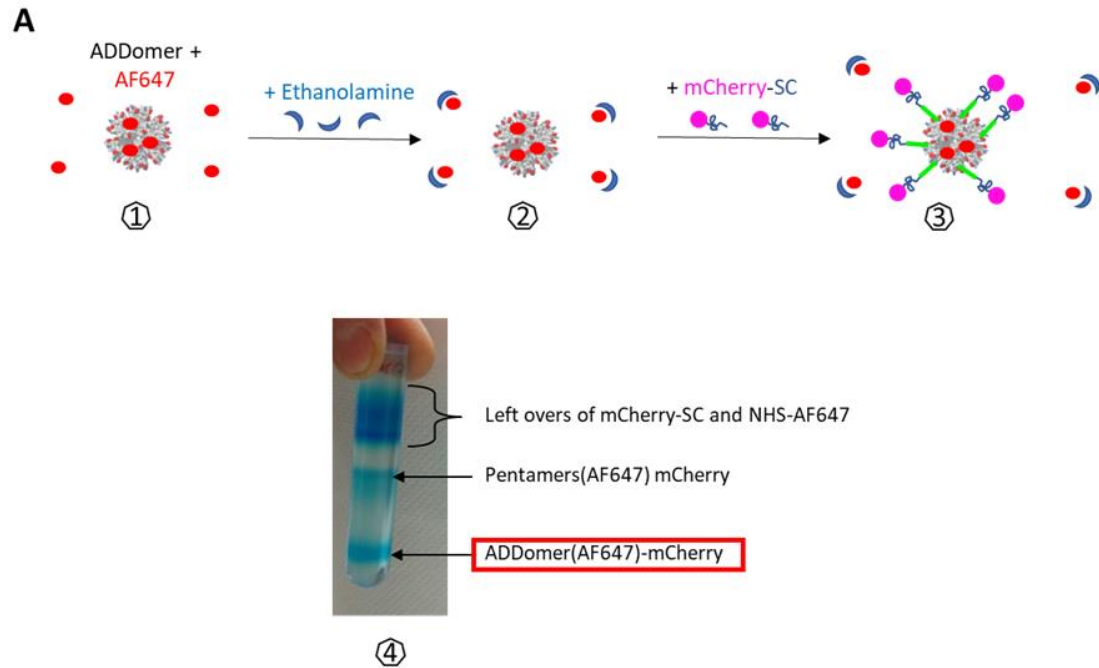

**B**

| 1                   | 2               | 3                  | 4              | 5                         |
|---------------------|-----------------|--------------------|----------------|---------------------------|
| mCherry-SC<br>Crt + | RBD-SC<br>Crt - | MelanA-SC<br>Crt - | ADD ST (AF647) | ADD ST (AF647)<br>mCherry |

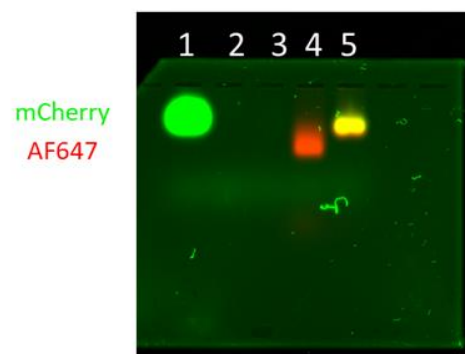

**Supplementary figure S2: Preparation of ADDomers labelled with Alexa 647 for ADDomers internalisation evaluation by DC subsets**

(A) Workflow of ADDomers AF647 preparation and purification (B) Agarose gel of labelled and non-labelled ADD mCherry.

**A**

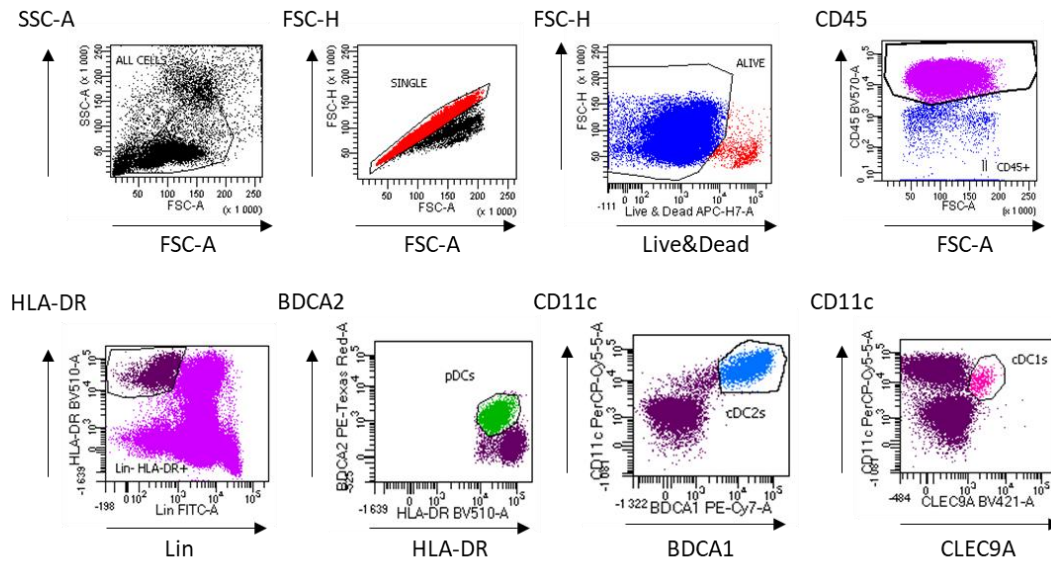

**B**

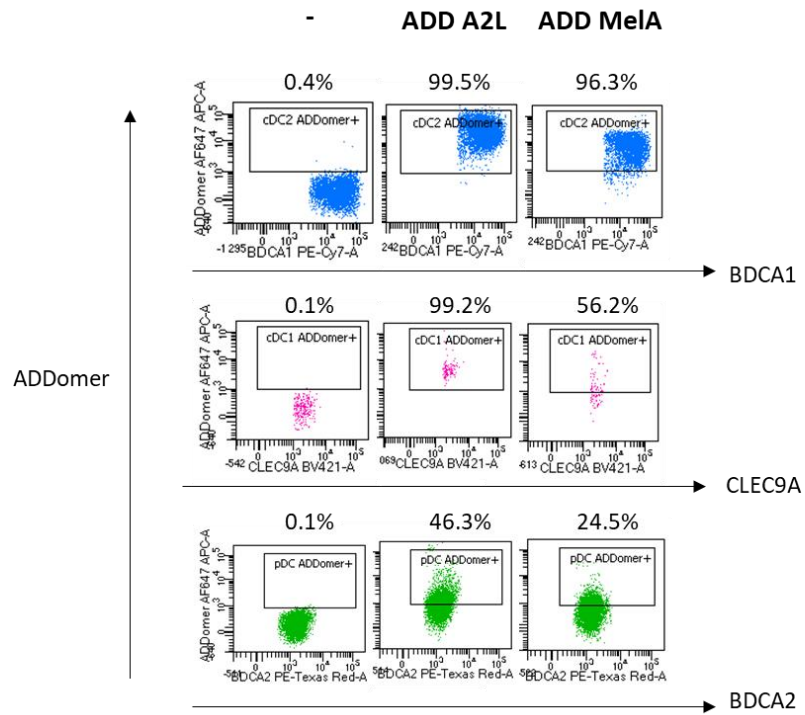

**Supplementary figure S3: Dotplots of ADDomer fixation on DC subsets**

(A)Gating strategy of DC subsets (B) ADDomer fixation on DC subsets.

**A**

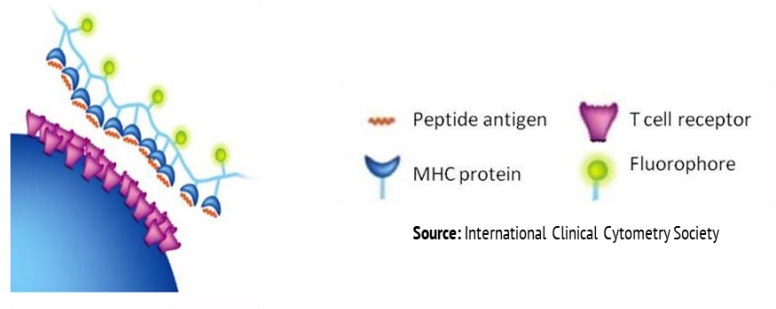

**B**

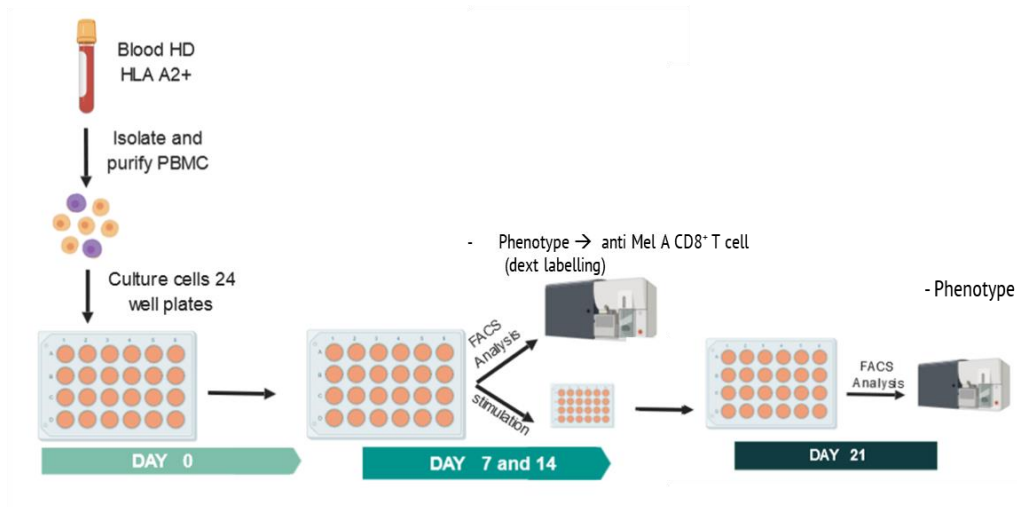

**C**

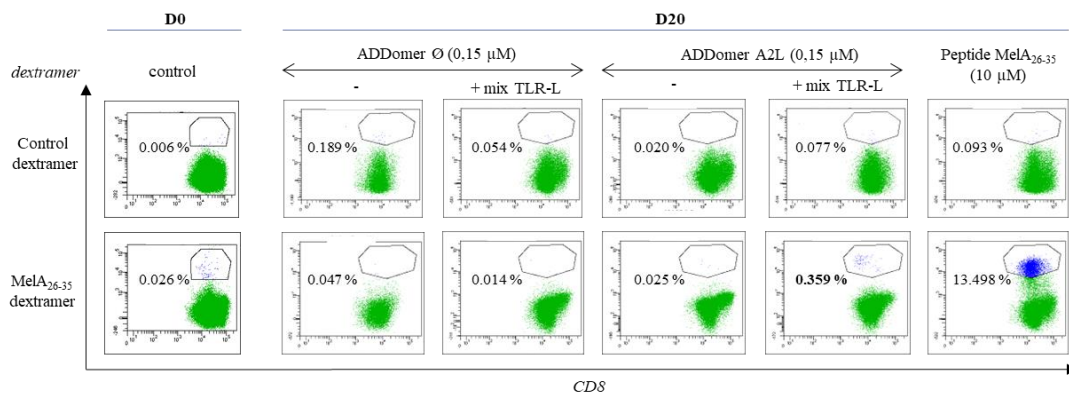

**Supplementary figure S4: ADD Ø and ADD A2L cross priming evaluation**

(A) dextramer (B) Workflow of ADD Ø and ADD A2L cross priming evaluation (C) Dot blots showing the percentage of CD8<sup>+</sup> Dext MelA<sup>+</sup> T cells at D0 and at D20 for each condition (dot plots pre-gated on CD45<sup>+</sup> CD3<sup>+</sup> CD8<sup>+</sup> T cells).

## ADD KGE RBD interaction with DC-SIGN

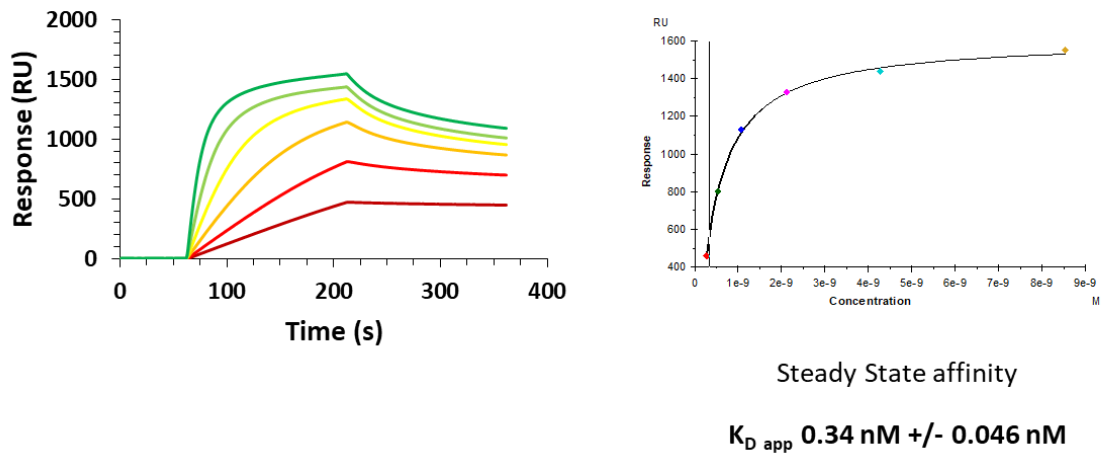

Supplementary figure S5: Zoom on ADD KGE RBD binding evaluation on DC-SIGN by surface plasmon resonance

Separate fitting of ADD KGE RBD with DC-SIGN.
